# Supplementary material for: Cultural Competence Interventions in European Healthcare: A Scoping Review
Source: MDPI journal article supplement (doi:10.3390/healthcare12101040), 2024-05-17
Supplement: s1 [file s1]

## Supplementary table

*Search string in specific database.*

| Database                                                                                                                                               | Search equation                                                                                                                                                                                                                                                                                                                                                                                                                                                                                                                                                                                                                                                                                                                                                                         |
|--------------------------------------------------------------------------------------------------------------------------------------------------------|-----------------------------------------------------------------------------------------------------------------------------------------------------------------------------------------------------------------------------------------------------------------------------------------------------------------------------------------------------------------------------------------------------------------------------------------------------------------------------------------------------------------------------------------------------------------------------------------------------------------------------------------------------------------------------------------------------------------------------------------------------------------------------------------|
| Scopus                                                                                                                                                 | TITLE-ABS-KEY [("intercultural" OR "cultural competenc*" OR "cultural awareness" OR "cultural sensitivity" OR "cultural safety" OR "cultural diversity" OR "cultural humility" OR "cultural literacy") AND ("health care" OR "healthcare" OR "primary care" OR "hospital*" OR "health servic*") AND ("health* professional*" OR "health* provider*" OR "health* work*" OR "health* practitioner*" OR doctor* OR nurs*) AND ( program* OR training* OR intervention*) AND (measur* OR evaluation* OR assess* OR outcome*) and NOT ("african american*" OR "black american*" OR indian* OR asia* OR aboriginal OR "torres strait islander*" OR "indigenous australiano*" OR "first nation") and NOT ("systematic review*" OR "meta-analysis" OR "literature review*")].                   |
| Web of Science, Core Collection, Current Contents Connect, Derwent Innovations Index, Grants Index, KCI-Korean Journal Database, SciELO Citation Index | TOPIC: TITLE-ABS-KEY [("intercultural" OR "cultural competenc*" OR "cultural awareness" OR "cultural sensitivity" OR "cultural safety" OR "cultural diversity" OR "cultural humility" OR "cultural literacy") AND ("health care" OR "healthcare" OR "primary care" OR "hospital*" OR "health servic*") AND ("health* professional*" OR "health* provider*" OR "health* work*" OR "health* practitioner*" OR doctor* OR nurs*) AND ( program* OR training* OR intervention*) AND (measur* OR evaluation* OR assess* OR outcome*) and NOT ("african american*" OR "black american*" OR indian* OR asia* OR aboriginal OR "torres strait islander*" OR "indigenous australiano*" OR "first nation") and NOT ("systematic review*" OR "meta-analysis" OR "literature review*")].            |
| Academic Search Ultimate, E-Journals, MedLine, and PsycINFO                                                                                            | Select a Field (TITLE-ABS-KEY): [("intercultural" OR "cultural competenc*" OR "cultural awareness" OR "cultural sensitivity" OR "cultural safety" OR "cultural diversity" OR "cultural humility" OR "cultural literacy") AND ("health care" OR "healthcare" OR "primary care" OR "hospital*" OR "health servic*") AND ("health* professional*" OR "health* provider*" OR "health* work*" OR "health* practitioner*" OR doctor* OR nurs*) AND ( program* OR training* OR intervention*) AND (measur* OR evaluation* OR assess* OR outcome*) and NOT ("african american*" OR "black american*" OR indian* OR asia* OR aboriginal OR "torres strait islander*" OR "indigenous australiano*" OR "first nation") and NOT ("systematic review*" OR "meta-analysis" OR "literature review*")]. |
| ProQuest- Research Library                                                                                                                             | Anywhere except full text-NOFT [("intercultural" OR "cultural competenc*" OR "cultural awareness" OR "cultural sensitivity" OR "cultural safety" OR "cultural diversity" OR "cultural humility" OR "cultural literacy") AND ("health care" OR "healthcare" OR "primary care" OR "hospital*" OR "health servic*") AND ("health* professional*" OR "health* provider*" OR "health* work*" OR "health* practitioner*" OR doctor* OR nurs*) AND ( program* OR training* OR intervention*) AND (measur* OR evaluation* OR assess* OR outcome*) and NOT ("african american*" OR "black american*" OR indian* OR asia* OR aboriginal OR "torres strait islander*" OR "indigenous australiano*" OR "first nation") and NOT ("systematic review*" OR "meta-analysis" OR "literature review*")].  |
| PubPsych<br><br>PubPsych is an online search platform that integrates multiple databases of psycho-logical literature and related fields, including    | All these words [("intercultural" OR "cultural competenc*" OR "cultural awareness" OR "cultural sensitivity" OR "cultural safety" OR "cultural diversity" OR "cultural humility" OR "cultural literacy") AND ("health care" OR "healthcare" OR "primary care" OR "hospital*" OR "health servic*") AND ("health* professional*" OR "health* provider*" OR "health* work*" OR "health* practitioner*" OR doctor* OR nurs*) AND ( program* OR training* OR intervention*) AND (measur* OR evaluation* OR assess* OR outcome*) and NOT ("african american*" OR "black american*" OR indian* OR asia* OR aboriginal OR "torres strait islander*" OR "indigenous australiano*" OR "first nation") and NOT ("systematic review*" OR "meta-analysis" OR "literature review*")]                  |

---

PSYINDEX-  
Germany, PASCAL-  
France, ISOC-  
Psicología-Spain,  
MEDLINE®-United  
States, ERIC-United  
States, NAR-CIS-  
Netherlands,  
NORART-Norway,  
PsychOpen-  
Germany, and  
PsychData-  
Germany

---
